# Supplementary material for: SARS-CoV-2 Specific Humoral Immune Responses after BNT162b2 Vaccination in Hospital Healthcare Workers
Source: MDPI journal article supplement (doi:10.3390/vaccines10122038), 2022-11-29
Supplement: s1 [file s1]

**Table S1.** Time distribution of first, second and third BNT162b2 vaccination among study participants [Quantitative data are presented as number (%)].

| <b>Time of vaccination</b> | <b>First dose</b> | <b>Second dose</b> | <b>Third dose</b> |
|----------------------------|-------------------|--------------------|-------------------|
| <b>December 2020</b>       | 31 (18.2)         | -                  | -                 |
| <b>January 2021</b>        | 74 (43.5)         | 57 (33.5)          | -                 |
| <b>Feburary 2021</b>       | 15 (8.2)          | 38 (22.4)          | -                 |
| <b>April 2021</b>          | 53 (30.6)         | 30 (17.6)          | -                 |
| <b>March 2021</b>          | -                 | 48 (26.5)          | -                 |
| <b>September 2021</b>      | -                 | -                  | 20 (19.2)         |
| <b>October 2021</b>        | -                 | -                  | 31 (29.8)         |
| <b>November 2021</b>       | -                 | -                  | 33 (31.7)         |
| <b>December 2021</b>       | -                 | -                  | 20 (19.2)         |
| <b>Total</b>               | <b>173</b>        | <b>173</b>         | <b>104</b>        |
